# Supplementary material for: A mixed methods feasibility study of the Kusamala Program at a nutritional rehabilitation unit in Malawi
Source: Pilot Feasibility Stud. 2018 Sep 24;4:151. doi: 10.1186/s40814-018-0347-8 (PMC6151933; doi:10.1186/s40814-018-0347-8)
Supplement: Supplementary file 3 — The dataset supporting the conclusions of this article. (XLS 116 kb) [file 40814_2018_347_MOESM3_ESM.xls]

## Sheet: Additionalfile5_dictionary
Variable / Field Name	Field Label	Choices / Calculations
arm	Arm	0, Comparison | 1, Intervention
unique_id	Participant Unique Number
date_enrollment	Date of Enrollment (D-M-Y)
child_sex	Please tell me the sex of the child involved in this study.	0, Male | 1, Female
child_dob	Please tell me the date of birth of the child involved in this study.
age_of_child	Age of child	datediff([child_dob],[date_enrollmentl], "M", "dmy", "true")
baseline_relation_to_child	What is your relationship to the child involved in this study?	0, Mother | 1, Other
baseline_other_relation_to_child	If 'other', please specify. Otherwise, skip this question.
baseline_caregiver_age	What is your age (in years)?
baseline_caregiver_school	Have you ever attended school or preschool?
baseline_income_last_month	What was the income for your household last month (in Kwacha)?
household_area	What area is your household located in?	0, Urban | 1, Rural
baseline_child_first_muac	First MUAC (cm)
baseline_child_second_muac	Second MUAC (cm)
baseline_child_weight	First weight measurement (kg)
baseline_child_first_height	First height or length measurement (cm)
baseline_child_second_height	Second height or length measurement (cm)
baseline_child_oedema	Oedema Present
date_hospital_admission	Date of Admission
date_hospital_discharge	Date of Discharge
duration_hospital_stay	Duration of Hospital Stay	datediff([date_hospital_discharge], [date_hospital_admission],"d","dmy")
early_discharge	Is discharge earlier than medically advised?
early_discharge_reason	If 'yes', what was the reason for early discharge? If no, skip this question.
neurodisability	Known or newly diagnosed chronic conditions: neurodisability
hiv_status	HIV status	1, RDT positive | 2, Known positive | 3, Already on Co-trim (if positive) | 4, Already on ART (if positive) | 5, RDT negative | 6, Declined testing
mortality_inpatient	Did the patient die in-hospital?
discharge_child_first_muac	First MUAC (cm)
discharge_child_second_muac	Second MUAC (cm)
discharge_child_weight	First weight measurement (kg)
discharge_child_first_height	First height or length measurement (cm)
discharge_child_second_height	Second height or length measurement (cm)
discharge_child_oedema	Oedema Present	0, No | 1, Yes
discharge_mdat_grossmotor_1	1. Amadzutsa chibwano kwa kamphindi	0, No | 1, Yes
discharge_mdat_grossmotor_2	2. Amadzutsa mutu koti amatha kuyang'ana kutsogolo	0, No | 1, Yes
discharge_mdat_grossmotor_3	3. Amalimbitsa khosi kwa kamphindi pang'ono akamunyamula pa phewa kapena akamubereka kumbuyo	0, No | 1, Yes
discharge_mdat_grossmotor_4	4. Amadzikoka kuti akhale pansi	0, No | 1, Yes
discharge_mdat_grossmotor_5	5. Amaimitsa mutu, mapewa ndi chidali ndipo amawongola manja ake, amadzutsa chidali kuckokera pansi ndi manja omwe	0, No | 1, Yes
discharge_mdat_grossmotor_6	6. Amalimbitsa miyendo yake mukamunyamula kuti ayime	0, No | 1, Yes
discharge_mdat_grossmotor_7	7. Amakhala pansi mothandizidwa (with a nice straight back)	0, No | 1, Yes
discharge_mdat_grossmotor_8	8. Amatembenuka ndikuchotsa manja ake kuti akhale chafufu mimba	0, No | 1, Yes
discharge_mdat_grossmotor_9	9. Amakhala opanda kumgwiririra kwa kamphindi/simungamukhazike kwa nthawi yaitali	0, No | 1, Yes
discharge_mdat_grossmotor_10	10. Amakhala pansi bwinobwino	0, No | 1, Yes
discharge_mdat_grossmotor_11	11. Amakwawa muli monse (ngakhale ndi matako)	0, No | 1, Yes
discharge_mdat_grossmotor_12	12. Ameyesera kudzidzutsa thupi lake kuti aime	0, No | 1, Yes
discharge_mdat_grossmotor_13	13. Amagwira chinthu kuti ayime bwino osagwa	0, No | 1, Yes
discharge_mdat_grossmotor_14	14. Amatha kuyenda mukamgwira manja onse	0, No | 1, Yes
discharge_mdat_grossmotor_15	15. Amatha kuyenda atagwira mkono umodzi wa munthu wina	0, No | 1, Yes
discharge_mdat_grossmotor_16	16. Amayenda bwino koma amatha kugwa nthawi zina	0, No | 1, Yes
discharge_mdat_grossmotor_17	17. Amatha kuwerama kapena kutola chinthu pansi osagwa	0, No | 1, Yes
discharge_mdat_grossmotor_18	18. Amatha kuyenda yekha bwino	0, No | 1, Yes
discharge_mdat_grossmotor_19	19. Amathamanga mwapang'onopang'ono kugwa nthawi zochepa	0, No | 1, Yes
discharge_mdat_grossmotor_20	20. Amatha kumenya mpira ngakhale ndi pang'ono	0, No | 1, Yes
discharge_mdat_grossmotor_21	21. Amathamanga bwino osagwa	0, No | 1, Yes
discharge_mdat_grossmotor_23	22. Kodi mwana wanu amakwera mipando kapena matebulo kuti afikire zinthu zimene akufuna?	0, No | 1, Yes
discharge_mdat_grossmotor_24	23. Amaponya mpira m'mwamba(amakweza dzanja ndi nkono)	0, No | 1, Yes
discharge_mdat_grossmotor_22	24. Akhonza kugwada ndikuthanso kuima opanda kugwirira chinthu	0, No | 1, Yes
discharge_mdat_grossmotor_25	25. amakwera pamwamba kapena pa ka nsanja kamene kapangidwa ndinso kudumpha kuchokera pamwamba kapena pa ka nsanja kamene kapangidwa mothandizidwa ndi wina	0, No | 1, Yes
discharge_mdat_grossmotor_26	26. amadumpha kuchokera pamwamba payekha	0, No | 1, Yes
discharge_mdat_grossmotor_27	27. Amaponya mpira ndikugwetsera mubasiketi kamodzi maulendo atatu pamtunda wa metre imodzi	0, No | 1, Yes
discharge_mdat_grossmotor_28	28. Amathamanga, kudzaima ndikumenya mpira bwino bwino kwa kaulendo ndithu	0, No | 1, Yes
discharge_mdat_grossmotor_29	29. Amalumpha ndi miyendo yonse iwiri pamodzi	0, No | 1, Yes
discharge_mdat_grossmotor_30	30. Amalumpha chingwe kapena mzere ojambulidwa pansi	0, No | 1, Yes
discharge_mdat_grossmotor_31	31. Amaima ndi mwendo umodzi kwa kampindi < 5 secs	0, No | 1, Yes
discharge_mdat_grossmotor_32	32. Amatha kuyenda ndi chidendene ma sitepe osachepera asanu ndi imodzi	0, No | 1, Yes
discharge_mdat_grossmotor_33	33. Amatha kulumpha pepala lomwe laikidwa kutsogolo	0, No | 1, Yes
discharge_mdat_grossmotor_34	34. Amayenda ndi zala za kumiyendo sitepe zokwana zisanu ndi imodzi	0, No | 1, Yes
discharge_mdat_grossmotor_35	35. Amalumpha ndi mwendo umodzi kokwana masitepe anayi	0, No | 1, Yes
discharge_mdat_grossmotor_36	36. Amaima ndi mwendo umodzi kwa kanthawi monga (eg. >10s - 1 min	0, No | 1, Yes
discharge_mdat_finemotor_1	1. Amatsatira ndi maso nkhope ya munthu kapena chinthu chowala, ngakhale chitasuntha pang'ono	0, No | 1, Yes
discharge_mdat_finemotor_2	2. Amatsatira ndi maso chinthu chowala kapena chimene akuchiona kwambiri kuchokera ku manja mpaka kumanzere	0, No | 1, Yes
discharge_mdat_finemotor_3	3. Amabweretsa manja ake onse awiri kunkhope ndipo amatha kuwazindikira kapena kuwaika mkamwa	0, No | 1, Yes
discharge_mdat_finemotor_4	4. Amafuna kufikira chinthu	0, No | 1, Yes
discharge_mdat_finemotor_5	5. Kawiri kawiri akagwira chinthu amafuna kuchiyika mkamwa	0, No | 1, Yes
discharge_mdat_finemotor_6	6. Amatha kufumbata chinthu ndi dzanja lake	0, No | 1, Yes
discharge_mdat_finemotor_7	7. Amatha kunyamula chinthu chachikulu pansi monga miyala olo supuni	0, No | 1, Yes
discharge_mdat_finemotor_8	8. Amazindikira zinthu zazing'ono monga chimanga, nyemba, amaziona olo amafuna kuzifikira	0, No | 1, Yes
discharge_mdat_finemotor_9	9. Amatha kuchotsa chinthu dzanja lina ndikuika dzanja lina	0, No | 1, Yes
discharge_mdat_finemotor_10	10. Amatola zinthu zazingo'ono ndi zala zonse zinayi	0, No | 1, Yes
discharge_mdat_finemotor_11	11. Amamenyetsa zinthu ziwiri zomwe wazigwira mmanja	0, No | 1, Yes
discharge_mdat_finemotor_12	12. Amapeza choseweretsa pansi pa chitenje	0, No | 1, Yes
discharge_mdat_finemotor_13	13. Amatha kugwira mbewu ya chimanga kapena nyemba pakati pa chala choyamba ndi chachiwiri	0, No | 1, Yes
discharge_mdat_finemotor_14	14. Amatsanzira kuponya zinthu monga miyala mu kapu	0, No | 1, Yes
discharge_mdat_finemotor_15	15. Amatha kukankha galimoto yaing'ono (yoseweretsa)	0, No | 1, Yes
discharge_mdat_finemotor_16	16. Amatsanzira kuponya miyala mu botolo la pulasitiki lomwe mwampasa	0, No | 1, Yes
discharge_mdat_finemotor_17	17. Amakhutula miyala kuchokera mu botolo la pulasitiki mozindikira	0, No | 1, Yes
discharge_mdat_finemotor_18	18. Amakhwatchakwatcha mizere papepala pogwiritsa ntchito choko kapena makala	0, No | 1, Yes
discharge_mdat_finemotor_19	19. Amazungulizazunguliza papepala pogwiritsa ntchito choko kapena makala	0, No | 1, Yes
discharge_mdat_finemotor_20	20. Amapanga chipirara cha miyala iwiri	0, No | 1, Yes
discharge_mdat_finemotor_21	21. Amaika mapegi asanu ndi atatu mu mabowo a bolodi mwanthawi yosapyola mphindi ziwiri (< 2 min)	0, No | 1, Yes
discharge_mdat_finemotor_22	22. Muuzeni mwana anyamule miyala iwiri ndipo akupatseni umodzi(onetsetsani kuti watenga miyala inayi m'manja)	0, No | 1, Yes
discharge_mdat_finemotor_23	23. Amapanga chipirara cha miyala inyai	0, No | 1, Yes
discharge_mdat_finemotor_24	24. Amapanga chipirara cha miyala isanu ndi imodzi	0, No | 1, Yes
discharge_mdat_finemotor_25	25. Ikani madzi odzada mu kapu imodzi ndinso ikani madzi ochepa mu kalpu ina ndipo mufunseni mwana kuti akupatseni kapu imene ile ndi madzi ambiri/ochuluka(mufunseni kuti apange izi katatu)	0, No | 1, Yes
discharge_mdat_finemotor_26	26. Amaika mapegi asanu ndi atatu mu mabowo a bolodi mwanthawi yosapyola mphindi ziwiri .......theka la mphindi (<30s)	0, No | 1, Yes
discharge_mdat_finemotor_27	27. Amatha kutseka chitsekerero cha botolo la pulasittiki mozungulira ndi kutsegula	0, No | 1, Yes
discharge_mdat_finemotor_28	28. Amatenga mikanda isanu ndi umodzi ndi kuika mu chingwe kapena ulusi	0, No | 1, Yes
discharge_mdat_finemotor_29	29. Tengani ma kapu a ma sayizi osiyana koma a mitundu yofanana ndipo mwana akupatseni kapu imene ili yayikulu kuposera inzake. Muuzeni mwana, ''ndipatse kapu imene ili yayikulu kwa inzake'?	0, No | 1, Yes
discharge_mdat_finemotor_30	30. Amatha kujambula mzere wowongoka	0, No | 1, Yes
discharge_mdat_finemotor_31	31. Amasankha mtengo wautali pa unzake pamaulendo atatu) "Wautali ndi uti?"	0, No | 1, Yes
discharge_mdat_finemotor_32	32. Amatha kuzindikira bokosi lomwe liri lolemera kuposa linzake? "Lolemera koposa liti"	0, No | 1, Yes
discharge_mdat_finemotor_33	33. Amapanga mlatho	0, No | 1, Yes
discharge_mdat_finemotor_34	34. Amatha kuumba munthu olo galimoto ndi dongo (or other complex things eg. A car)	0, No | 1, Yes
discharge_mdat_finemotor_35	35. Amatha kukopela lozungulira lopanda mpata	0, No | 1, Yes
discharge_mdat_finemotor_36	36. Amatha kukopela mtanda	0, No | 1, Yes
discharge_mdat_language_1	1. Amadzidzimuka akamva phokoso	0, No | 1, Yes
discharge_mdat_language_2	2. Amapanga phokoso osati kulira monga "uh", "eh", "a"	0, No | 1, Yes
discharge_mdat_language_3	3. Amaseka	0, No | 1, Yes
discharge_mdat_language_4	4. Amatembenukira komwe kukumveka mau (ngati munthu sakuoneka kodi amayang'ana komwe kukuchokera mau kapena phokoso)	0, No | 1, Yes
discharge_mdat_language_5	5. Amapanga phokoso lomveka ndi liu limodzi monga ma/da/pa/ba	0, No | 1, Yes
discharge_mdat_language_6	6. Amazindikira dzina lake ndipo amasonyeza kuzindikira kuti waitanidwa	0, No | 1, Yes
discharge_mdat_language_7	7. Amapanga phokoso dada, mama, mimi, tata, mau awiri kufikira anayi opanda thandauzo	0, No | 1, Yes
discharge_mdat_language_8	8. Amadzindikira pamene achenjezedwa pa choopsya monga ponena kuti "ayi" amasiya kwakanthawi pang'ono	0, No | 1, Yes
discharge_mdat_language_9	9. Amakana pogwedeza mutu kapenanso mapewa	0, No | 1, Yes
discharge_mdat_language_10	10. Amapanga chomwe wauzidwa, monga "ndi patse kapu"	0, No | 1, Yes
discharge_mdat_language_11	11. Amayankhula mau osamveka bwino, amayesera kuyankhula koma zimakhala zopanda pake	0, No | 1, Yes
discharge_mdat_language_12	12. Amanena mawu ena awiri kuphatikiza pa mama, dada monga kapu, ng'ombe, supuni?	0, No | 1, Yes
discharge_mdat_language_13	13. Amanena mau awiri ophatikizana monga mamansima, mama-pita, madziakumwa, dadi bwera	0, No | 1, Yes
discharge_mdat_language_14	14. Amanena mawu asanu ndi amodzi	0, No | 1, Yes
discharge_mdat_language_15	15. Amatha kupanga zinthu zimene wauzidwa monga "tenga kapu ndipo iike mu basiketi"	0, No | 1, Yes
discharge_mdat_language_16	16. 5 Amazindikira zinthu monga ... njinga, sipuni, kapu, mpira, galimoto, mbale. Kumuuza kuti..... "Ndi patse.................." More than 5 recognised	0, No | 1, Yes
discharge_mdat_language_17	17. Amatha kuyankhula bwino mwachidule zinthu zimene zachitika	0, No | 1, Yes
discharge_mdat_language_18	18. Amaloza ziwalo za nthupi lake Kumunfunsa: "kodi..........ili pati?" > 1 body part	0, No | 1, Yes
discharge_mdat_language_19	19. Amatchula maina a zinthu zimene zili m'bokosi. Kumfunsa mwana kuti ichi ndichani?" Named at least 5	0, No | 1, Yes
discharge_mdat_language_20	20. Mwana amadziwa dzina lake (amatha kutchula dzina lake)	0, No | 1, Yes
discharge_mdat_language_21	21. Amazindikira ntchito ya zinthu monga "Chodyera phala ndi chiti?". "Chosesera ndi chiti?" "Chomwera madzi ndi chiti?"	0, No | 1, Yes
discharge_mdat_language_22	22. Amazindikira zinthu monga ... njinga, sipuni, kapu, mpira, galimoto, mbale. Kumuuza kuti..... "Ndi patse.................." More than 10 recognised	0, No | 1, Yes
discharge_mdat_language_23	23. Amatchula maina a zinthu zimene zili m'bokosi. Kumfunsa mwana kuti ichi ndichani?" Named at least 10	0, No | 1, Yes
discharge_mdat_language_24	24. kodi mwana angathe kuyankhula kapena kufotokoza za zinthu zimene zinachitika m'mbuyomu, mwa chitsanzo, kukamba za zimene zinachitika dzulo?	0, No | 1, Yes
discharge_mdat_language_25	25. Kodi mwana angathe kuyimba nyimbo kapena kunena mau ena amene akuwakumbikira?	0, No | 1, Yes
discharge_mdat_language_26	26. Kumunfunsa mwana... "Ndiuze zinthu zimene umadya..." or "Ndiuze nyama zimene umadziwa...."	0, No | 1, Yes
discharge_mdat_language_27	27. Amatha kupanga zinthu zitatu zimene wauzidwa, monga " imilira, womba mmanja ndi pita uko......."	0, No | 1, Yes
discharge_mdat_language_28	28. Funsani....Umatani ndi njinga? Umatani ndi pensulo? Pamafunika mayankho monga, timakwera njinga, timajambulira zithuzi, timamwera madzi	0, No | 1, Yes
discharge_mdat_language_29	29. Akhonza kukumbukira zilembo - chilembo : "Pa, Chi, Tu, Go" 2 out of 4 eg. Pa, Chi	0, No | 1, Yes
discharge_mdat_language_30	30. Funsani..... Umatani ukamva njala? Umatani ukatopa? Umatani kukazizira?	0, No | 1, Yes
discharge_mdat_language_31	31. Amadziwa yankho la funso monga "kodi galimoto ndi njinga chimathamanga kwambiri ndi chiani?"	0, No | 1, Yes
discharge_mdat_language_32	32. Akhonza kukumbukira zilembo - chilembo : "Pa, Chi, Tu, Go" 4 out of 4 __________	0, No | 1, Yes
discharge_mdat_language_33	33.. Mufunse mwana aike - PANSI, PAMWAMBA, KUSELI, PAKATI..... *Angathe kuchita zinthu zitatu mwa zinthu zimene zili pamwambapa	0, No | 1, Yes
discharge_mdat_language_34	34. Amadziwa mawu otsutsana a zinthu monga, "abambo ndi aakulu, mwana ndi........." "Ngati dzuwa lituluka masana mwezi, utuluka ....... (must do 2 of 3 of these)	0, No | 1, Yes
discharge_mdat_language_35	35. Amadziwa kuchuluka kwa zinthu zokwana zisanu. Mwachitsanzo ukafunsa kuti izi ndi zingati.... Can count up to THREE bricks	0, No | 1, Yes
discharge_mdat_language_36	36. Amadziwa kuchuluka kwa zinthu zokwana zisanu. Mwachitsanzo ukafunsa kuti izi ndi zingati.... Can count up to FIVE bricks	0, No | 1, Yes
discharge_mdat_social_1	1. Amamwetulira payekha popanda munthu kapena popanda kanthu.	0, No | 1, Yes
discharge_mdat_social_2	2. Amamwetulira anthu	0, No | 1, Yes
discharge_mdat_social_3	3. Amagwedeza thupi kusonyeza kukondwa ndi anthu ena	0, No | 1, Yes
discharge_mdat_social_4	4. Amasewera yekha, kugwedeza thupi kuponyaponya miyendo mosangalala.. "Kodi mwana amasewera motani?"	0, No | 1, Yes
discharge_mdat_social_5	5. Amazindikira abale ndikukhala omasuka ndi omwe amamusamalira komanso abale ake- Funsani.."Kodi mwana amazindikira mayi ndi abale akamalira amasiya akawaona?"	0, No | 1, Yes
discharge_mdat_social_6	6. Amadya phala kuchokera pa supuni yomwe womusamalira waigwira	0, No | 1, Yes
discharge_mdat_social_7	7. Naye amagwira kapu akamamumwetsa madzi	0, No | 1, Yes
discharge_mdat_social_8	8. Amadziwongola kuti anyamulidwe	0, No | 1, Yes
discharge_mdat_social_9	9. Amagwria supuni ya phala koma osayibweretsa kukamwa kuti adzidyetse	0, No | 1, Yes
discharge_mdat_social_10	10. Amamwera mkapu opanda kudzitayira	0, No | 1, Yes
discharge_mdat_social_11	11. Amatha kuloza chinthu chimene akufuna	0, No | 1, Yes
discharge_mdat_social_12	12. Amakhoza kutola nsima yekha yomwe amayi ake amutemera. "Kodi mwana amatha kudya pagulu potola mbamu za nsima zomwe amayi ake amutemera kale?"	0, No | 1, Yes
discharge_mdat_social_13	13. Amapereka manja kwa mayi kuti asambitsidwe, pakudya	0, No | 1, Yes
discharge_mdat_social_14	14. Kodi mwana amasewera ponamizira kuti zinthu zimene akusewera nazo ndi zinthu zina osati m'mene ziliri?	0, No | 1, Yes
discharge_mdat_social_15	15. Amatenga supuni ndikudzidyetsa phala, kungozitayira pang'ono	0, No | 1, Yes
discharge_mdat_social_16	16. Amaonetsa zizindikiro zoti akufuna kukabiba kapena kukodza monga kulira, kukoka kabudula kapena kunena mawu ena ake	0, No | 1, Yes
discharge_mdat_social_17	17. Amafuna kulowa nawo masewero oyimba ndi anzake "Kodi amafuna kusewera masewero a nyimbo omwe ana okulirapo akusewera ngakhale iye sangathe?"	0, No | 1, Yes
discharge_mdat_social_18	18. Amatha kupereka moni wapamanja kapena wamau	0, No | 1, Yes
discharge_mdat_social_19	19. Amagawana zinthu ndi anzake kuphatikiza zakudya. "Kodi mukampatsa mwana wanu nthochi kapena chakudya chozuna, amagawira anzake?"	0, No | 1, Yes
discharge_mdat_social_20	20. Amatha kubiba kapena kukodza payekha osaipitsa zovala	0, No | 1, Yes
discharge_mdat_social_21	21. Amadya phala ndi supuni osadzitayira	0, No | 1, Yes
discharge_mdat_social_22	22. Kodi mwana amapanga masanje kapena kuyesezera kuphika zinthu (monga nsima) ndi ziwiya zoseweretsa monga zitini ndi dothi?	0, No | 1, Yes
discharge_mdat_social_23	23. Amakhonza kutema mbamu za nsima ndi kuika mkamwa (makamaka ndi ndiwo zofewa)	0, No | 1, Yes
discharge_mdat_social_24	24. Amatha kuvula zovala payekha monga kabudula, dilesi kapena siketi (even 1 item!)	0, No | 1, Yes
discharge_mdat_social_25	25. Amafuna kupita kukacheza kwa anzake payekha	0, No | 1, Yes
discharge_mdat_social_26	26. Amachita chimbuzi payekha	0, No | 1, Yes
discharge_mdat_social_27	27. Amakhonza kudya chomwe chili ndi zinyenyeswa kapena mafupa	0, No | 1, Yes
discharge_mdat_social_28	28. Amatha kuvala payekha chovala ngakhale osakwanitsa bwino lomwe	0, No | 1, Yes
discharge_mdat_social_29	29. Amasamba mmanja yekha asanadye chakudya komanso akamaliza kudya	0, No | 1, Yes
discharge_mdat_social_30	30. Amadziwa kuti ayenera kukhala chete pa gulu la anthu aakulu eg. Kutchalitchi, pamaliro, pamsonkhano	0, No | 1, Yes
discharge_mdat_social_31	31. Amathandiza ntchito za pakhomo monga kutunga madzi	0, No | 1, Yes
discharge_mdat_social_32	32. Amatha kuvala payekha	0, No | 1, Yes
discharge_mdat_social_33	33. Amadziwa zotsatira za kuchita zoipa mwachitsanzo ngati ayankhula mau oipa monga kutukwana	0, No | 1, Yes
discharge_mdat_social_34	34. Amasewera ma sewera opatsana mpata monga fulaye, jingo ndi mila. "Ngati akusewera masewero opatsana mpata. Kodi amatha kudikira kuti nthawi yake ifike/ ikwane?"	0, No | 1, Yes
discharge_mdat_social_35	35. Amadziwa kupereka ulemu kwa akuluakulu monga kugwada popereka moni olo kuodira	0, No | 1, Yes
discharge_mdat_social_36	36. Amakhonza kupita kuchimbuzi payekha	0, No | 1, Yes
mortality_outpatient	Did the participant die after discharge?	0, No | 1, Yes
followup_mdat_grossmotor_1	1. Amadzutsa chibwano kwa kamphindi	0, No | 1, Yes
followup_mdat_grossmotor_2	2. Amadzutsa mutu koti amatha kuyang'ana kutsogolo	0, No | 1, Yes
followup_mdat_grossmotor_3	3. Amalimbitsa khosi kwa kamphindi pang'ono akamunyamula pa phewa kapena akamubereka kumbuyo	0, No | 1, Yes
followup_mdat_grossmotor_4	4. Amadzikoka kuti akhale pansi	0, No | 1, Yes
followup_mdat_grossmotor_5	5. Amaimitsa mutu, mapewa ndi chidali ndipo amawongola manja ake, amadzutsa chidali kuckokera pansi ndi manja omwe	0, No | 1, Yes
followup_mdat_grossmotor_6	6. Amalimbitsa miyendo yake mukamunyamula kuti ayime	0, No | 1, Yes
followup_mdat_grossmotor_7	7. Amakhala pansi mothandizidwa (with a nice straight back)	0, No | 1, Yes
followup_mdat_grossmotor_8	8. Amatembenuka ndikuchotsa manja ake kuti akhale chafufu mimba	0, No | 1, Yes
followup_mdat_grossmotor_9	9. Amakhala opanda kumgwiririra kwa kamphindi/simungamukhazike kwa nthawi yaitali	0, No | 1, Yes
followup_mdat_grossmotor_10	10. Amakhala pansi bwinobwino	0, No | 1, Yes
followup_mdat_grossmotor_11	11. Amakwawa muli monse (ngakhale ndi matako)	0, No | 1, Yes
followup_mdat_grossmotor_12	12. Ameyesera kudzidzutsa thupi lake kuti aime	0, No | 1, Yes
followup_mdat_grossmotor_13	13. Amagwira chinthu kuti ayime bwino osagwa	0, No | 1, Yes
followup_mdat_grossmotor_14	14. Amatha kuyenda mukamgwira manja onse	0, No | 1, Yes
followup_mdat_grossmotor_15	15. Amatha kuyenda atagwira mkono umodzi wa munthu wina	0, No | 1, Yes
followup_mdat_grossmotor_16	16. Amayenda bwino koma amatha kugwa nthawi zina	0, No | 1, Yes
followup_mdat_grossmotor_17	17. Amatha kuwerama kapena kutola chinthu pansi osagwa	0, No | 1, Yes
followup_mdat_grossmotor_18	18. Amatha kuyenda yekha bwino	0, No | 1, Yes
followup_mdat_grossmotor_19	19. Amathamanga mwapang'onopang'ono kugwa nthawi zochepa	0, No | 1, Yes
followup_mdat_grossmotor_20	20. Amatha kumenya mpira ngakhale ndi pang'ono	0, No | 1, Yes
followup_mdat_grossmotor_21	21. Amathamanga bwino osagwa	0, No | 1, Yes
followup_mdat_grossmotor_23	22. Kodi mwana wanu amakwera mipando kapena matebulo kuti afikire zinthu zimene akufuna?	0, No | 1, Yes
followup_mdat_grossmotor_24	23. Amaponya mpira m'mwamba(amakweza dzanja ndi nkono)	0, No | 1, Yes
followup_mdat_grossmotor_22	24. Akhonza kugwada ndikuthanso kuima opanda kugwirira chinthu	0, No | 1, Yes
followup_mdat_grossmotor_25	25. amakwera pamwamba kapena pa ka nsanja kamene kapangidwa ndinso kudumpha kuchokera pamwamba kapena pa ka nsanja kamene kapangidwa mothandizidwa ndi wina	0, No | 1, Yes
followup_mdat_grossmotor_26	26. amadumpha kuchokera pamwamba payekha	0, No | 1, Yes
followup_mdat_grossmotor_27	27. Amaponya mpira ndikugwetsera mubasiketi kamodzi maulendo atatu pamtunda wa metre imodzi	0, No | 1, Yes
followup_mdat_grossmotor_28	28. Amathamanga, kudzaima ndikumenya mpira bwino bwino kwa kaulendo ndithu	0, No | 1, Yes
followup_mdat_grossmotor_29	29. Amalumpha ndi miyendo yonse iwiri pamodzi	0, No | 1, Yes
followup_mdat_grossmotor_30	30. Amalumpha chingwe kapena mzere ojambulidwa pansi	0, No | 1, Yes
followup_mdat_grossmotor_31	31. Amaima ndi mwendo umodzi kwa kampindi < 5 secs	0, No | 1, Yes
followup_mdat_grossmotor_32	32. Amatha kuyenda ndi chidendene ma sitepe osachepera asanu ndi imodzi	0, No | 1, Yes
followup_mdat_grossmotor_33	33. Amatha kulumpha pepala lomwe laikidwa kutsogolo	0, No | 1, Yes
followup_mdat_grossmotor_34	34. Amayenda ndi zala za kumiyendo sitepe zokwana zisanu ndi imodzi	0, No | 1, Yes
followup_mdat_grossmotor_35	35. Amalumpha ndi mwendo umodzi kokwana masitepe anayi	0, No | 1, Yes
followup_mdat_grossmotor_36	36. Amaima ndi mwendo umodzi kwa kanthawi monga (eg. >10s - 1 min	0, No | 1, Yes
followup_mdat_finemotor_1	1. Amatsatira ndi maso nkhope ya munthu kapena chinthu chowala, ngakhale chitasuntha pang'ono	0, No | 1, Yes
followup_mdat_finemotor_2	2. Amatsatira ndi maso chinthu chowala kapena chimene akuchiona kwambiri kuchokera ku manja mpaka kumanzere	0, No | 1, Yes
followup_mdat_finemotor_3	3. Amabweretsa manja ake onse awiri kunkhope ndipo amatha kuwazindikira kapena kuwaika mkamwa	0, No | 1, Yes
followup_mdat_finemotor_4	4. Amafuna kufikira chinthu	0, No | 1, Yes
followup_mdat_finemotor_5	5. Kawiri kawiri akagwira chinthu amafuna kuchiyika mkamwa	0, No | 1, Yes
followup_mdat_finemotor_6	6. Amatha kufumbata chinthu ndi dzanja lake	0, No | 1, Yes
followup_mdat_finemotor_7	7. Amatha kunyamula chinthu chachikulu pansi monga miyala olo supuni	0, No | 1, Yes
followup_mdat_finemotor_8	8. Amazindikira zinthu zazing'ono monga chimanga, nyemba, amaziona olo amafuna kuzifikira	0, No | 1, Yes
followup_mdat_finemotor_9	9. Amatha kuchotsa chinthu dzanja lina ndikuika dzanja lina	0, No | 1, Yes
followup_mdat_finemotor_10	10. Amatola zinthu zazingo'ono ndi zala zonse zinayi	0, No | 1, Yes
followup_mdat_finemotor_11	11. Amamenyetsa zinthu ziwiri zomwe wazigwira mmanja	0, No | 1, Yes
followup_mdat_finemotor_12	12. Amapeza choseweretsa pansi pa chitenje	0, No | 1, Yes
followup_mdat_finemotor_13	13. Amatha kugwira mbewu ya chimanga kapena nyemba pakati pa chala choyamba ndi chachiwiri	0, No | 1, Yes
followup_mdat_finemotor_14	14. Amatsanzira kuponya zinthu monga miyala mu kapu	0, No | 1, Yes
followup_mdat_finemotor_15	15. Amatha kukankha galimoto yaing'ono (yoseweretsa)	0, No | 1, Yes
followup_mdat_finemotor_16	16. Amatsanzira kuponya miyala mu botolo la pulasitiki lomwe mwampasa	0, No | 1, Yes
followup_mdat_finemotor_17	17. Amakhutula miyala kuchokera mu botolo la pulasitiki mozindikira	0, No | 1, Yes
followup_mdat_finemotor_18	18. Amakhwatchakwatcha mizere papepala pogwiritsa ntchito choko kapena makala	0, No | 1, Yes
followup_mdat_finemotor_19	19. Amazungulizazunguliza papepala pogwiritsa ntchito choko kapena makala	0, No | 1, Yes
followup_mdat_finemotor_20	20. Amapanga chipirara cha miyala iwiri	0, No | 1, Yes
followup_mdat_finemotor_21	21. Amaika mapegi asanu ndi atatu mu mabowo a bolodi mwanthawi yosapyola mphindi ziwiri (< 2 min)	0, No | 1, Yes
followup_mdat_finemotor_22	22. Muuzeni mwana anyamule miyala iwiri ndipo akupatseni umodzi(onetsetsani kuti watenga miyala inayi m'manja)	0, No | 1, Yes
followup_mdat_finemotor_23	23. Amapanga chipirara cha miyala inyai	0, No | 1, Yes
followup_mdat_finemotor_24	24. Amapanga chipirara cha miyala isanu ndi imodzi	0, No | 1, Yes
followup_mdat_finemotor_25	25. Ikani madzi odzada mu kapu imodzi ndinso ikani madzi ochepa mu kalpu ina ndipo mufunseni mwana kuti akupatseni kapu imene ile ndi madzi ambiri/ochuluka(mufunseni kuti apange izi katatu)	0, No | 1, Yes
followup_mdat_finemotor_26	26. Amaika mapegi asanu ndi atatu mu mabowo a bolodi mwanthawi yosapyola mphindi ziwiri .......theka la mphindi (<30s)	0, No | 1, Yes
followup_mdat_finemotor_27	27. Amatha kutseka chitsekerero cha botolo la pulasittiki mozungulira ndi kutsegula	0, No | 1, Yes
followup_mdat_finemotor_28	28. Amatenga mikanda isanu ndi umodzi ndi kuika mu chingwe kapena ulusi	0, No | 1, Yes
followup_mdat_finemotor_29	29. Tengani ma kapu a ma sayizi osiyana koma a mitundu yofanana ndipo mwana akupatseni kapu imene ili yayikulu kuposera inzake. Muuzeni mwana, ''ndipatse kapu imene ili yayikulu kwa inzake'?	0, No | 1, Yes
followup_mdat_finemotor_30	30. Amatha kujambula mzere wowongoka	0, No | 1, Yes
followup_mdat_finemotor_31	31. Amasankha mtengo wautali pa unzake pamaulendo atatu) "Wautali ndi uti?"	0, No | 1, Yes
followup_mdat_finemotor_32	32. Amatha kuzindikira bokosi lomwe liri lolemera kuposa linzake? "Lolemera koposa liti"	0, No | 1, Yes
followup_mdat_finemotor_33	33 .Amapanga mlatho	0, No | 1, Yes
followup_mdat_finemotor_34	34. Amatha kuumba munthu olo galimoto ndi dongo (or other complex things eg. A car)	0, No | 1, Yes
followup_mdat_finemotor_35	35. Amatha kukopela lozungulira lopanda mpata	0, No | 1, Yes
followup_mdat_finemotor_36	36. Amatha kukopela mtanda	0, No | 1, Yes
followup_mdat_language_1	1. Amadzidzimuka akamva phokoso	0, No | 1, Yes
followup_mdat_language_2	2. Amapanga phokoso osati kulira monga "uh", "eh", "a"	0, No | 1, Yes
followup_mdat_language_3	3. Amaseka	0, No | 1, Yes
followup_mdat_language_4	4. Amatembenukira komwe kukumveka mau (ngati munthu sakuoneka kodi amayang'ana komwe kukuchokera mau kapena phokoso)	0, No | 1, Yes
followup_mdat_language_5	5. Amapanga phokoso lomveka ndi liu limodzi monga ma/da/pa/ba	0, No | 1, Yes
followup_mdat_language_6	6. Amazindikira dzina lake ndipo amasonyeza kuzindikira kuti waitanidwa	0, No | 1, Yes
followup_mdat_language_7	7. Amapanga phokoso dada, mama, mimi, tata, mau awiri kufikira anayi opanda thandauzo	0, No | 1, Yes
followup_mdat_language_8	8. Amadzindikira pamene achenjezedwa pa choopsya monga ponena kuti "ayi" amasiya kwakanthawi pang'ono	0, No | 1, Yes
followup_mdat_language_9	9. Amakana pogwedeza mutu kapenanso mapewa	0, No | 1, Yes
followup_mdat_language_10	10. Amapanga chomwe wauzidwa, monga "ndi patse kapu"	0, No | 1, Yes
followup_mdat_language_11	11. Amayankhula mau osamveka bwino, amayesera kuyankhula koma zimakhala zopanda pake	0, No | 1, Yes
followup_mdat_language_12	12. Amanena mawu ena awiri kuphatikiza pa mama, dada monga kapu, ng'ombe, supuni?	0, No | 1, Yes
followup_mdat_language_13	13. Amanena mau awiri ophatikizana monga mamansima, mama-pita, madziakumwa, dadi bwera	0, No | 1, Yes
followup_mdat_language_14	14. Amanena mawu asanu ndi amodzi	0, No | 1, Yes
followup_mdat_language_15	15. Amatha kupanga zinthu zimene wauzidwa monga "tenga kapu ndipo iike mu basiketi"	0, No | 1, Yes
followup_mdat_language_16	16. 5 Amazindikira zinthu monga ... njinga, sipuni, kapu, mpira, galimoto, mbale. Kumuuza kuti..... "Ndi patse.................." More than 5 recognised	0, No | 1, Yes
followup_mdat_language_17	17. Amatha kuyankhula bwino mwachidule zinthu zimene zachitika	0, No | 1, Yes
followup_mdat_language_18	18. Amaloza ziwalo za nthupi lake Kumunfunsa: "kodi..........ili pati?" > 1 body part	0, No | 1, Yes
followup_mdat_language_19	19. Amatchula maina a zinthu zimene zili m'bokosi. Kumfunsa mwana kuti ichi ndichani?" Named at least 5	0, No | 1, Yes
followup_mdat_language_20	20. Mwana amadziwa dzina lake (amatha kutchula dzina lake)	0, No | 1, Yes
followup_mdat_language_21	21. Amazindikira ntchito ya zinthu monga "Chodyera phala ndi chiti?". "Chosesera ndi chiti?" "Chomwera madzi ndi chiti?"	0, No | 1, Yes
followup_mdat_language_22	22. Amazindikira zinthu monga ... njinga, sipuni, kapu, mpira, galimoto, mbale. Kumuuza kuti..... "Ndi patse.................." More than 10 recognised	0, No | 1, Yes
followup_mdat_language_23	23. Amatchula maina a zinthu zimene zili m'bokosi. Kumfunsa mwana kuti ichi ndichani?" Named at least 10	0, No | 1, Yes
followup_mdat_language_24	24. kodi mwana angathe kuyankhula kapena kufotokoza za zinthu zimene zinachitika m'mbuyomu, mwa chitsanzo, kukamba za zimene zinachitika dzulo?	0, No | 1, Yes
followup_mdat_language_25	25. Kodi mwana angathe kuyimba nyimbo kapena kunena mau ena amene akuwakumbikira?	0, No | 1, Yes
followup_mdat_language_26	26. Kumunfunsa mwana... "Ndiuze zinthu zimene umadya..." or "Ndiuze nyama zimene umadziwa...."	0, No | 1, Yes
followup_mdat_language_27	27. Amatha kupanga zinthu zitatu zimene wauzidwa, monga " imilira, womba mmanja ndi pita uko......."	0, No | 1, Yes
followup_mdat_language_28	28. Funsani....Umatani ndi njinga? Umatani ndi pensulo? Pamafunika mayankho monga, timakwera njinga, timajambulira zithuzi, timamwera madzi.	0, No | 1, Yes
followup_mdat_language_29	29. Akhonza kukumbukira zilembo - chilembo : "Pa, Chi, Tu, Go" 2 out of 4 eg. Pa, Chi	0, No | 1, Yes
followup_mdat_language_30	30. Funsani..... Umatani ukamva njala? Umatani ukatopa? Umatani kukazizira?	0, No | 1, Yes
followup_mdat_language_31	31. Amadziwa yankho la funso monga "kodi galimoto ndi njinga chimathamanga kwambiri ndi chiani?"	0, No | 1, Yes
followup_mdat_language_32	32. Akhonza kukumbukira zilembo - chilembo : "Pa, Chi, Tu, Go" 4 out of 4 __________	0, No | 1, Yes
followup_mdat_language_33	33.. Mufunse mwana aike - PANSI, PAMWAMBA, KUSELI, PAKATI..... *Angathe kuchita zinthu zitatu mwa zinthu zimene zili pamwambapa	0, No | 1, Yes
followup_mdat_language_34	34. Amadziwa mawu otsutsana a zinthu monga, "abambo ndi aakulu, mwana ndi........." "Ngati dzuwa lituluka masana mwezi, utuluka ....... (must do 2 of 3 of these)	0, No | 1, Yes
followup_mdat_language_35	35. Amadziwa kuchuluka kwa zinthu zokwana zisanu. Mwachitsanzo ukafunsa kuti izi ndi zingati.... Can count up to THREE bricks	0, No | 1, Yes
followup_mdat_language_36	36. Amadziwa kuchuluka kwa zinthu zokwana zisanu. Mwachitsanzo ukafunsa kuti izi ndi zingati.... Can count up to FIVE bricks	0, No | 1, Yes
followup_mdat_social_1	1. Amamwetulira payekha popanda munthu kapena popanda kanthu	0, No | 1, Yes
followup_mdat_social_2	2. Amamwetulira anthu	0, No | 1, Yes
followup_mdat_social_3	3. Amagwedeza thupi kusonyeza kukondwa ndi anthu ena	0, No | 1, Yes
followup_mdat_social_4	4. Amasewera yekha, kugwedeza thupi kuponyaponya miyendo mosangalala.. "Kodi mwana amasewera motani?"	0, No | 1, Yes
followup_mdat_social_5	5. Amazindikira abale ndikukhala omasuka ndi omwe amamusamalira komanso abale ake- Funsani.."Kodi mwana amazindikira mayi ndi abale akamalira amasiya akawaona?"	0, No | 1, Yes
followup_mdat_social_6	6. Amadya phala kuchokera pa supuni yomwe womusamalira waigwira	0, No | 1, Yes
followup_mdat_social_7	7. Naye amagwira kapu akamamumwetsa madzi	0, No | 1, Yes
followup_mdat_social_8	8. Amadziwongola kuti anyamulidwe	0, No | 1, Yes
followup_mdat_social_9	9. Amagwria supuni ya phala koma osayibweretsa kukamwa kuti adzidyetse	0, No | 1, Yes
followup_mdat_social_10	10. Amamwera mkapu opanda kudzitayira	0, No | 1, Yes
followup_mdat_social_11	11. Amatha kuloza chinthu chimene akufuna	0, No | 1, Yes
followup_mdat_social_12	12. Amakhoza kutola nsima yekha yomwe amayi ake amutemera. "Kodi mwana amatha kudya pagulu potola mbamu za nsima zomwe amayi ake amutemera kale?"	0, No | 1, Yes
followup_mdat_social_13	13. Amapereka manja kwa mayi kuti asambitsidwe, pakudya	0, No | 1, Yes
followup_mdat_social_14	14. Kodi mwana amasewera ponamizira kuti zinthu zimene akusewera nazo ndi zinthu zina osati m'mene ziliri?	0, No | 1, Yes
followup_mdat_social_15	15. Amatenga supuni ndikudzidyetsa phala, kungozitayira pang'ono	0, No | 1, Yes
followup_mdat_social_16	16. Amaonetsa zizindikiro zoti akufuna kukabiba kapena kukodza monga kulira, kukoka kabudula kapena kunena mawu ena ake	0, No | 1, Yes
followup_mdat_social_17	17. Amafuna kulowa nawo masewero oyimba ndi anzake "Kodi amafuna kusewera masewero a nyimbo omwe ana okulirapo akusewera ngakhale iye sangathe?"	0, No | 1, Yes
followup_mdat_social_18	18. Amatha kupereka moni wapamanja kapena wamau	0, No | 1, Yes
followup_mdat_social_19	19. Amagawana zinthu ndi anzake kuphatikiza zakudya. "Kodi mukampatsa mwana wanu nthochi kapena chakudya chozuna, amagawira anzake?"	0, No | 1, Yes
followup_mdat_social_20	20. Amatha kubiba kapena kukodza payekha osaipitsa zovala	0, No | 1, Yes
followup_mdat_social_21	21. Amadya phala ndi supuni osadzitayira	0, No | 1, Yes
followup_mdat_social_22	22. Kodi mwana amapanga masanje kapena kuyesezera kuphika zinthu (monga nsima) ndi ziwiya zoseweretsa monga zitini ndi dothi?	0, No | 1, Yes
followup_mdat_social_23	23. Amakhonza kutema mbamu za nsima ndi kuika mkamwa (makamaka ndi ndiwo zofewa)	0, No | 1, Yes
followup_mdat_social_24	24. Amatha kuvula zovala payekha monga kabudula, dilesi kapena siketi (even 1 item!)	0, No | 1, Yes
followup_mdat_social_25	25. Amafuna kupita kukacheza kwa anzake payekha	0, No | 1, Yes
followup_mdat_social_26	26. Amachita chimbuzi payekha	0, No | 1, Yes
followup_mdat_social_27	27. Amakhonza kudya chomwe chili ndi zinyenyeswa kapena mafupa	0, No | 1, Yes
followup_mdat_social_28	28. Amatha kuvala payekha chovala ngakhale osakwanitsa bwino lomwe	0, No | 1, Yes
followup_mdat_social_29	29. Amasamba mmanja yekha asanadye chakudya komanso akamaliza kudya	0, No | 1, Yes
followup_mdat_social_30	30. Amadziwa kuti ayenera kukhala chete pa gulu la anthu aakulu eg. Kutchalitchi, pamaliro, pamsonkhano	0, No | 1, Yes
followup_mdat_social_31	31. Amathandiza ntchito za pakhomo monga kutunga madzi	0, No | 1, Yes
followup_mdat_social_32	32. Amatha kuvala payekha	0, No | 1, Yes
followup_mdat_social_33	33. Amadziwa zotsatira za kuchita zoipa mwachitsanzo ngati ayankhula mau oipa monga kutukwana	0, No | 1, Yes
followup_mdat_social_34	34. Amasewera ma sewera opatsana mpata monga fulaye, jingo ndi mila. "Ngati akusewera masewero opatsana mpata. Kodi amatha kudikira kuti nthawi yake ifike/ ikwane?"	0, No | 1, Yes
followup_mdat_social_35	35. Amadziwa kupereka ulemu kwa akuluakulu monga kugwada popereka moni olo kuodira	0, No | 1, Yes
followup_mdat_social_36	36. Amakhonza kupita kuchimbuzi payekha	0, No | 1, Yes

## Sheet: Additionalfile5_data
arm	unique_id	date_enrollment	child_sex	child_dob	age_of_child	baseline_relation_to_child	baseline_other_relation_to_child	baseline_caregiver_age	baseline_income_last_month	household_area	baseline_child_first_muac	baseline_child_second_muac	baseline_child_weight	baseline_child_first_height	baseline_child_second_height	baseline_child_oedema	date_hospital_admission	date_hospital_discharge	duration_hospital_stay	early_discharge	early_discharge_reason	neurodisability	hiv_status	mortality_inpatient	discharge_child_first_muac	discharge_child_second_muac	discharge_child_weight	discharge_child_first_height	discharge_child_second_height	discharge_child_oedema	discharge_mdat_grossmotor_1	discharge_mdat_grossmotor_0	discharge_mdat_grossmotor_3	discharge_mdat_grossmotor_4	discharge_mdat_grossmotor_5	discharge_mdat_grossmotor_6	discharge_mdat_grossmotor_7	discharge_mdat_grossmotor_8	discharge_mdat_grossmotor_9	discharge_mdat_grossmotor_10	discharge_mdat_grossmotor_11	discharge_mdat_grossmotor_10	discharge_mdat_grossmotor_13	discharge_mdat_grossmotor_14	discharge_mdat_grossmotor_15	discharge_mdat_grossmotor_16	discharge_mdat_grossmotor_17	discharge_mdat_grossmotor_18	discharge_mdat_grossmotor_19
0	7347514	2017-01-16	1	2015-03-24	21.8148	0		20	30000	0	11.9	11.9	6.4	71.9	71.9	0	2017-01-16	2017-01-19	3	0		0	5	0	12	12	6.9	71.9	71.9	0	1	1	1	1	1	1	1	1	1	1	1	1	1	1	1	1	1	1	1
0	5034145	2017-02-21	0	2016-01-22	13.0092	0		29	50000	1	10.6	10.7	5.8	70.9	70.8	0	2017-02-21	2017-03-02	9	0		0	4	0	11	11.1	6	69.9	70	0	1	1	1	1	1	1	1	1	1	1	1	1	1	1	1	0	0	0	0
0	8247655	2017-01-30	1	2016-06-06	7.82003	0		19	26000	0	12.9	12.8	7.8	74	74.1	1	2017-01-30	2017-02-07	8	0		0	5	0	12	12.8	6.9	74.1	74	0	1	1	1	1	1	1	1	1	1	1	1	1	1	1	1	1	1	1	0
0	4384502	2017-01-30	0	2015-10-15	15.5401	0		28	3000	0	11.2	11.3	7.1	72.8	72.9	0	2017-01-30	2017-02-04	5	1	Absconded	0	4	0
0	3871327	2017-01-30	0	2015-11-25	14.1919	0		26	10000	0	11.3	11.2	5.5	65.9	65.9	0	2017-01-30	2017-02-03	4	0		0	5	0	11.3	11.4	5.7	69.8	69.9	0	1	1	1	1	1	1	1	1	1	1	1	1	1	1	1	0	0	0	0
0	5328335	2017-03-06	0	2014-06-25	32.3601	0		34		0	11.7	11.6	9.7	79.8	79.7	1	2017-03-05	2017-03-20	15	0		0	5	0	10.5	10.6	9	82.3	81.1	1	1	1	1	1	1	1	1	1	1	1	1	1	1	1	1	1	1	1	1
0	8762078	2017-04-03	1	2015-05-01	23.0946	0		18	20000	1	12.3	12.4	9.7	73.5	73.6	1	2017-04-03	2017-04-07	4	0		0		0	13	12.8	9.8	75.8	75.8	0	1	1	1	1	1	1	1	1	1	1	1	1	1	1	1	1	1	1	0
0	4928189	2017-01-16	0	2015-10-14	15.1131	0		19	40000	0	11	11	5.7	70	70	0	2017-01-16	2017-01-17	1	0		0	5	1
0	2398591	2017-03-13	1	2015-08-20	18.7582	1	Grandmother	68	3000	1	11.5	11.4	6	67	67.1	0	2017-03-13	2017-03-14	1	0		0	5	0	11.2	11.3	5.9	66	66	0	1	1	1	1	1	1	1	1	1	1	1	1	1	0	0	0	0	0	0
0	7142728	2017-03-13	1	2015-10-07	17.1813	0		30	5000	1	11.3	11.2	6.3	70.5	70.4	0	2017-03-13	2017-03-23	10	0		0	1	0	12.6	12.7	7.9	69.8	69.9	0	1	1	1	1	1	1	1	1	1	1	1	1	1	1	1	1	1	1	1
0	3148098	2017-01-30	1	2014-01-27	36.1038	0		22	1000	1	9.9	9.8	7.7	81.9	81.9	1	2017-01-30	2017-02-07	8	0		0	5	0	9.9	9.9	6.4	79.5	79.4	0	1	1	1	1	1	1	1	1	1	1	1	1	1	1	1	1	1	1	1
0	6329584	2017-01-30	0	2016-01-21	12.3193	0		26	15000	0	11.4	11.3	6.5	70.2	70.1	0	2017-01-30	2017-02-03	4	0		0	4	0	11.6	11.5	6.3	70.1	70	0	1	1	1	1	1	1	1	1	1	1	1	1	1	1	1	0	0	0	0
0	9083170	2017-02-21	1	2015-12-20	14.0933	0		27	1800	1	11.4	11.5	6	69	69.1	0	2017-02-20	2017-02-24	4	0		0	5	0	11.5	11.6	6.1	69.1	69	0	1	1	1	1	1	1	1	1	1	1	1	1	1	1	1	0	0	0	0
0	4074573	2017-03-06	1	2015-12-31	14.159	0		21	3000	0	11.4	11.5	6.3	71	71.1	0	2017-03-04	2017-03-08	4	0		0		0	11.2	11.2	6.1	69.5	69.5	0	1	1	1	1	1	1	1	1	1	1	1	1	1	1	1	0	0	0	0
1	8042210	2017-01-09	0	2016-04-25	8.50991	0		17	5000	0	10.6	10.5	4.6	60.5	60.4	0	2017-01-09	2017-01-13	4	0		0	1	0	10.5	10.6	4.4	60.5	60.5	0	1	1	1	1	1	1	1	1	1	1	0	0	0	0	0	0	0	0	0
1	7288232	2017-01-23	1	2015-11-16	14.2576	0		21	35000	0	10.5	10.5	5.9	67.4	67.2	0	2017-01-23	2017-01-30	7	0		0	2	0	10.4	10.5	6	68	68.1	0	1	1	1	1	1	1	1	1	1	1	1	1	1	1	1	0	0	0	0
1	8482923	2017-01-23	1	2014-11-15	26.2812	0		22	15000	1	12.1	12	7.8	77.1	77	1	2017-01-21	2017-01-25	4	0		0	5	0	12	12.1	7.9	76.2	76.1	0	1	1	1	1	1	1	1	1	1	1	1	1	1	1	1	1	1	1	1
1	8550382	2016-12-05	0	2014-12-23	23.4231	0		39	5000	1	11.2	11.3	8.1	79.5	79.6	0	2016-12-03	2016-12-09	6	0		0	5	0	12.3	12.2	8.6	79.5	79.6	0	1	1	1	1	1	1	1	1	1	1	1	1	1	1	1	1	1	1	1
1	6659068	2017-02-13	1	2014-03-30	34.5283	0		25	2500	1	11.4	11.5	7.5	81.4	81.5	0	2017-02-13	2017-02-21	8	0		1	5	0	11.5	11.6	7.5	81.4	81.5	0	1	1	1	1	1	1	1	1	0	0	1	1	0	1	1	0	0	0	0
1	5077550	2017-02-13	0	2014-06-17	31.933	1	Grandmother	37	1500	0	14.5	14.4	8.5	71.5	71.6	1	2017-02-13	2017-02-20	7	0		0	5	0	13.8	13.7	7.6	71.7	71.8	0	1	1	1	1	1	1	1	1	1	1	1	1	1	1	1	1	1	1	1
1	5767837	2017-02-27	0	2016-07-01	7.91858	0		30	1000	1	9	9	5.2	67	67	0	2017-02-27	2017-03-24	25	0		0	5	0	10.6	10.4	5.6	65	64.8	0	1	0	1	0	0	1	0	0	0	0	0	0	0	0	0	0	0	0	0
1	5899279	2016-12-05	1	2015-10-04	14.0618	0		24	3000	0	9.9	9.9	5.8	69.4	69.3	0	2016-12-02	2017-01-05	34	0		0	4	0	10.4	10.4	5.7	69	69	0	1	1	1	1	1	1	1	1	1	1	1	1	0	0	0	0	0	0	0
1	6058866	2017-02-28	0	2015-08-18	18.3982	0		22	17000	1	11.7	11.7	6.5	72.9	72.9	0	2017-02-28	2017-03-06	6	0		0	5	0	12.2	12.2	6.7	70.6	70.5	0	1	1	1	1	1	1	1	1	1	1	1	1	1	1	1	1	0	0	0
1	3995824	2017-01-23	1	2016-06-06	7.59007	0		42	24000	1	10.5	10.5	4.5	60.1	60.3	0	2017-01-23	2017-02-01	9	0		0	4	0	11	11	4.8	61.1	61	0	1	1	1	1	1	1	1	1	1	1	1	1	0	1	0	0	0	0	0
1	6103118	2017-02-27	1	2015-10-07	16.7228	0		17	20000	0	10.9	11	6.1	71	71.2	0	2017-02-27	2017-03-05	6	0		0	5	0	10.1	10.2	6.4	71	71.2	0	1	1	1	1	1	1	1	1	1	1	1	1	1	1	1	0	0	0	0
1	9070871	2017-01-09	1	2014-11-09	26.0184	0		22	20000	1	10.9	10.8	6.4	70.4	70.3	0	2017-01-09	2017-01-19	10	0		0	5	0	11.5	11.5	6.8	70.4	70.4	0	1	1	1	1	1	1	1	1	1	1	1	1	1	1	1	0	0	0	0
1	9082285	2017-02-13	0	2015-04-18	21.9133	0		28	50000	0	11.9	11.8	8	77.9	77.8	1	2017-02-13	2017-02-20	7	0		0	5	0	12	12.2	8	79.4	79.5	0	1	1	1	1	1	1	1	1	1	1	1	1	1	1	1	1	1	1	0
1	4129794	2017-02-27	0	2016-02-24	12.1222	0		28	150000	0	10.6	10.5	6	67.5	67.4	0	2017-02-27	2017-03-02	3	0		0	5	0	10.6	10.7	6	67.5	67.6	0	1	1	1	1	1	1	1	1	1	1	1	1	1	1	1	0	0	0	0
1	9916641	2017-02-27	0	2015-12-19	14.3233	0		35	25000	0	11.3	11.2	7.4	73.5	73.4	0	2017-02-24	2017-03-01	5	0		0	5	0	11.3	11.4	7.2	73.5	73.5	0	1	1	1	1	1	1	1	1	1	1	1	1	0	0	0	0	0	0	0
[truncated: 206 more columns]
